# Supplementary material for: Synthesis and catalytic activity of palladium supported on heteroatom doped single-wall carbon nanohorns
Source: Royal Society of Chemistry journal article supplement (doi:10.1039/c7ra04460g), 2017-01-01
Supplement: c7ra04460g1.pdf [file c7ra04460g1.pdf]

## Synthesis and Catalytic Activity of Palladium Supported on Heteroatom Doped Single-wall Carbon Nanohorns

Received 00th January 20xx,  
Accepted 00th January 20xx

DOI: 10.1039/x0xx00000x

www.rsc.org/

Xueyou Tan,<sup>a</sup> Xiaohui Wu,<sup>a</sup> Ziqi Hu,<sup>a</sup> Ding Ma<sup>b</sup> and Zujin Shi\*<sup>a</sup>

<sup>a</sup> Beijing National Laboratory for Molecular Sciences, State Key Lab of Rare Earth Materials Chemistry and Applications, College of Chemistry and Molecular Engineering, Peking University, Beijing 100871, P. R. China.  
E-mail: zjshi@pku.edu.cn

<sup>b</sup> Beijing National Laboratory for Molecular Sciences, College of Chemistry and Molecular Engineering, Peking University, Beijing 100871, P. R. China.

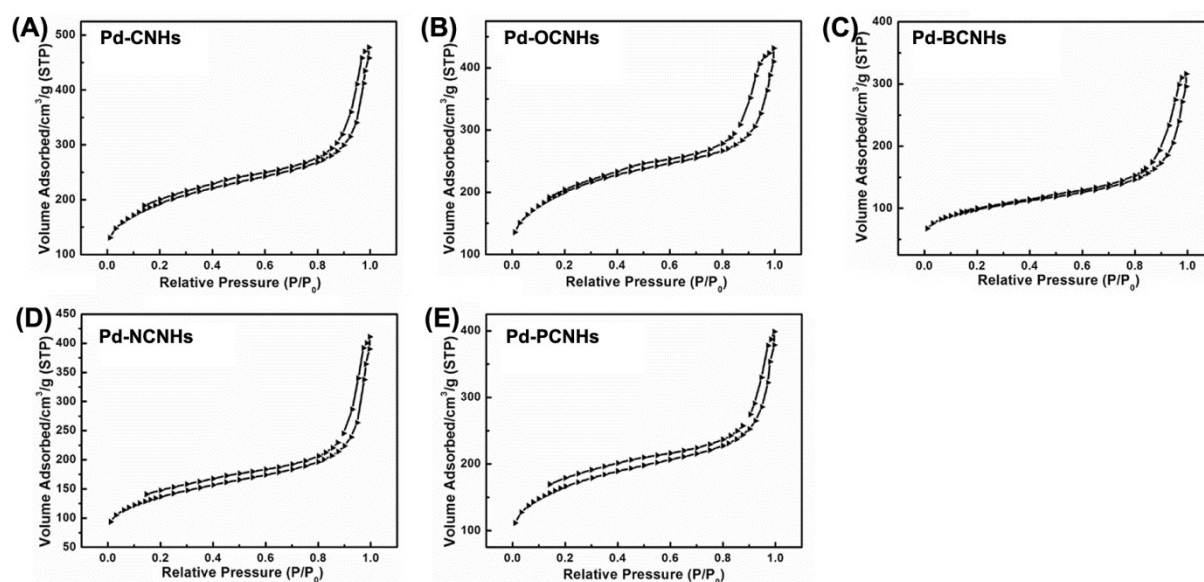

Fig. S1 N<sub>2</sub> adsorption-desorption isotherms of (A) Pd-CNHs, (B) Pd-OCNHs, (C) Pd-BCNHs, (D) Pd-NCNHs and (E) Pd-PCNHs, respectively.

Table S1 BET specific surface area (m<sup>2</sup> g<sup>-1</sup>) and pore size (nm) of catalysts

|          | BET specific surface area (m <sup>2</sup> g <sup>-1</sup> ) | Pore size (nm) |
|----------|-------------------------------------------------------------|----------------|
| Pd-CNHs  | 672.5                                                       | 3.74           |
| Pd-OCNHs | 697.4                                                       | 3.17           |
| Pd-BCNHs | 355.7                                                       | 4.30           |
| Pd-NCNHs | 475.4                                                       | 4.35           |
| Pd-PCNHs | 578.9                                                       | 3.40           |

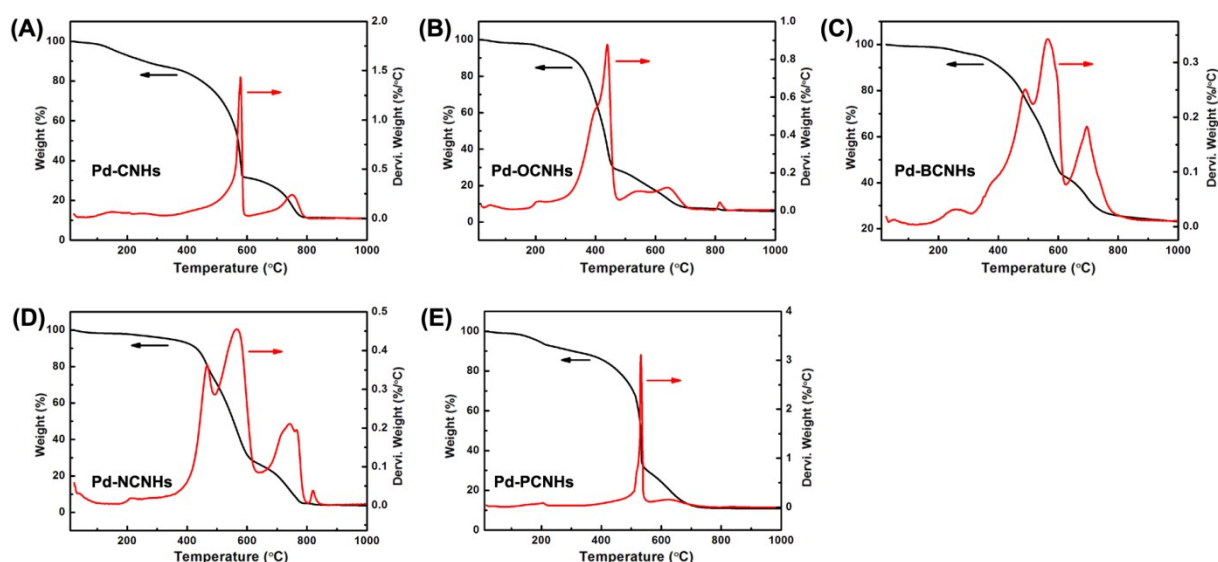

**Fig. S2** TGA curves of (A) Pd-CNHS, (B) Pd-OCNHS, (C) Pd-BCNHS, (D) Pd-NCNHS, and (E) Pd-PCNHS, respectively.

For Pd-CNHS, the peaks at 579.5 and 749.8 °C were described as CNHS and graphitic carbon,<sup>1-2</sup> respectively. The peaks at 439, 643 and 815 °C in the Pd-OCNHS were attributed to combination of defective carbon, tubular graphene carbon and graphitic carbon, respectively. For Pd-BCNHS, graphitic carbon, B-doped CNHS and tubular graphene carbon can be burned at 489, 564 and 695 °C.<sup>1-2</sup> Pd-NCNHS shows two main peaks at 467 °C and 565 °C, separately, which were attributed to a combination of N-doped defective carbon and N-doped tubular graphene carbon, and two peaks at 743 °C and 766 °C were both ascribed to graphitic carbon. For Pd-PCNHS, a main peak at 532 °C and a concomitantly weak peak at 634 °C appeared, corresponding to P-doped defective carbon and tubular graphene carbon, respectively.

**Table S2** The atomic percent of dopants in sample determined by XPS

| Sample   | C (At%) | O (At%) | B (At%) | N (At%) | P (At%) |
|----------|---------|---------|---------|---------|---------|
| Pd-CNHS  | 98.79   | 1.09    | 0       | 0       | 0       |
| Pd-OCNHS | 97.50   | 2.33    | 0       | 0       | 0       |
| Pd-BCNHS | 96.37   | 2.72    | 0.71    | 0       | 0       |
| Pd-NCNHS | 97.44   | 1.06    | 0       | 1.33    | 0       |
| Pd-PCNHS | 98.39   | 1.39    | 0       | 0       | 0.07    |

**Table S3** The proportion of surface palladium species in sample determined by XPS

| Sample   | Pd <sup>0</sup> (%) | Pd <sup>2+</sup> (%) |
|----------|---------------------|----------------------|
| Pd-CNHS  | 32.95               | 67.05                |
| Pd-OCNHS | 61.73               | 38.27                |
| Pd-BCNHS | 60.88               | 39.12                |
| Pd-NCNHS | 32.54               | 67.46                |
| Pd-PCNHS | 33.51               | 66.49                |

### Notes and references

1 X. Wu, L. Cui, P. Tang, Z. Hu, D. Ma and Z. Shi, *Chem. Commun.*, 2016, **52**, 5391.

2 L. Sun, C. Wang, Y. Zhou, X. Zhang, B. Cai and J. Qiu, *Appl. Surf. Sci.*, 2013, **277**, 88.
